# Supplementary material for: Cell-extracellular matrix interactions in the fluidic phase direct the topology and polarity of self-organized epithelial structures
Source: bioRxiv or medRxiv preprint supplement (doi:10.1101/2020.05.12.090068), 2021-02-14
Supplement: Supplementary file [file media-1.pdf]

## Supporting Information

### Cell-extracellular matrix interactions in the fluidic phase direct the topology and polarity of self-organized epithelial structures

Mingxing Ouyang<sup>1,2\*</sup>, Jiun-Yann Yu<sup>2</sup>, Yenyu Chen<sup>2</sup>, Linhong Deng<sup>1</sup>, Chin-Lin Guo<sup>2,3\*</sup>

<sup>1</sup>Institute of Biomedical Engineering and Health Sciences, Changzhou University, Changzhou, Jiangsu Province, 213164 China

<sup>2</sup>Department of Bioengineering, California Institute of Technology, MS 138-78, 1200 E. California Blvd, Pasadena, CA 91125 USA

<sup>3</sup>Institute of Physics, Academia Sinica, NanKang District, Taipei, Taiwan 11579 Republic of China

Supporting information includes:

1. Supplementary Figure;
2. Supplementary Movie legends.

**Running title:** Extracellular matrix directs the topology and polarity of epithelium

## Supplementary Figure

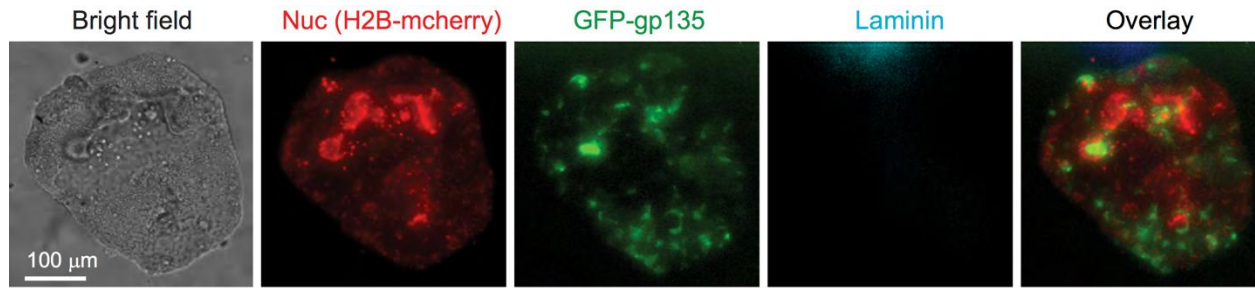

**Figure S1. No lateral assembly of laminin around the non-polarized cell clusters.** MDCK cells were cultured for 12 days on BM gels without soluble BM in the medium, followed by the immuno-staining of laminin. The images show the represented fluorescent images of gp135-GFP (green), H2B-mCherry (red), laminin staining (cyan), and their overlay. Scale bar: 100  $\mu\text{m}$ .

## Supplementary Movie legends

**Movie 1.** Time-lapse epi-fluorescence images of polarized tubule development on a BM gel. MDCK cells expressed H2B-mCherry and gp135-GFP to indicate their nucleus and polarity, respectively. Cells were seeded on a BM gel with 20  $\mu\text{g/ml}$  type I collagen (COL) in the medium. Time interval: 22 minutes.

**Movie 2.** Time-lapse epi-fluorescence images of polarized lobule development on a BM gel. MDCK cells expressed H2B-mCherry and gp135-GFP to indicate their nucleus and polarity, respectively. Cells were seeded on a BM gel with 2% BM in the medium. Time interval: 22 minutes.

**Movie 3.** Time-lapse epi-fluorescence images of random cyst formation on a basement membrane (BM) gel. MDCK cells expressed H2B-mCherry and gp135-GFP to indicate their

nucleus and polarity, respectively. Cells were seeded on a BM gel without ECM in the medium.  
Time interval: 22 minutes.

**Movie 4.** The reconstructed 3-D views of two lobules. Cell nucleus is shown in red color, and laminin immunostaining in green. Note the lateral condensation of laminin around the lobules (outlined by cell nuclei) and the absence of laminin staining on the top and bottom of lobules.

**Movie 5.** Time sequence for the growth of dividing cells into polarized lobule. The MCDK cells expressing gp135-GFP and H2B-mCherry were seeded on BM Matrigel gel with 2% BM in medium, and time-lapse two-photon confocal imaging started with 3 or 4 h interval time one day later (details seen in Figure 4 legend). Acquired confocal images were processed by 3-D reconstructions, and rotated 3-D views of each 4 or 5 time-points (in hours) from the time-sequence images displayed the growth and polarization of the clusters into 3-D lobular structure. As a note, it was not sure whether the cell sample on the first two panels was exactly the same one on the last four panels, as cells were much motile at early stage during imaging.

**Movie 6.** The reconstructed 3-D views of lobules from suspension culture with 2% BM above agarose gel. Cell nucleus is shown in red color, and laminin immunostaining in green. Note the lateral staining of laminin around the lobules (outlined by cell nuclei) and the absence of laminin staining on the top and bottom of lobules.
